# Supplementary material
Source: PubMed Central journal article supplement (PMC7039771)
Supplement: NIHMS1542093-supplement-3.pdf [file NIHMS1542093-supplement-3.pdf]

**A****Comprehensive Prediction Results**

| Mutation Site |      | Structural Features    |                            |
|---------------|------|------------------------|----------------------------|
| Protein:      | 3J9T | SS element:            | Other (turns, coils, etc.) |
| Chain:        | O    | Solvent accessibility: | 27.57%                     |
| Wild type AA: | ILE  | Torsion angles:        | -115.5°, 20.8°             |
| Residue ID:   | 178  |                        |                            |

**Amino Acid Mutations**

| Amino acid | Overall Stability  | Torsion*          | Predicted $\Delta\Delta G$ (kcal/mol) |
|------------|--------------------|-------------------|---------------------------------------|
| GLY        | Destabilising      | Unfavourable      | -0.17                                 |
| ALA        | Destabilising      | Unfavourable      | -0.09                                 |
| VAL        | Destabilising      | Unfavourable      | -0.11                                 |
| LEU        | Stabilising        | Unfavourable      | 0.08                                  |
| MET        | Destabilising      | Unfavourable      | -0.75                                 |
| PRO        | Destabilising      | Unfavourable      | -0.06                                 |
| TRP        | Stabilising        | Favourable        | 0.28                                  |
| SER        | Stabilising        | Unfavourable      | 0.39                                  |
| <b>THR</b> | <b>Stabilising</b> | <b>Favourable</b> | <b>0.63</b>                           |
| PHE        | Stabilising        | Favourable        | 0.53                                  |
| GLN        | Stabilising        | Unfavourable      | 0.37                                  |
| LYS        | Destabilising      | Unfavourable      | -0.59                                 |
| TYR        | Stabilising        | Favourable        | 0.32                                  |
| ASN        | Stabilising        | Favourable        | 0.35                                  |
| CYS        | Stabilising        | Favourable        | 0.04                                  |
| GLU        | Stabilising        | Unfavourable      | 0.33                                  |
| ASP        | Stabilising        | Favourable        | 0.49                                  |
| ARG        | Stabilising        | Unfavourable      | 0.58                                  |
| HIS        | Stabilising        | Favourable        | 0.92                                  |

**B****Comprehensive Prediction Results**

| Mutation Site |      | Structural Features    |                            |
|---------------|------|------------------------|----------------------------|
| Protein:      | 3J9U | SS element:            | Other (turns, coils, etc.) |
| Chain:        | O    | Solvent accessibility: | 41.62%                     |
| Wild type AA: | ILE  | Torsion angles:        | -120.9°, 148.6°            |
| Residue ID:   | 178  |                        |                            |

**Amino Acid Mutations**

| Amino acid | Overall Stability    | Torsion*          | Predicted $\Delta\Delta G$ (kcal/mol) |
|------------|----------------------|-------------------|---------------------------------------|
| GLY        | Destabilising        | Unfavourable      | -1.64                                 |
| ALA        | Destabilising        | Unfavourable      | -1.13                                 |
| VAL        | Destabilising        | Favourable        | -1.18                                 |
| LEU        | Destabilising        | Favourable        | -1.46                                 |
| MET        | Destabilising        | Favourable        | -1.22                                 |
| PRO        | Destabilising        | Unfavourable      | -1.35                                 |
| TRP        | Destabilising        | Favourable        | -1.95                                 |
| SER        | Destabilising        | No change         | -1.23                                 |
| <b>THR</b> | <b>Destabilising</b> | <b>Favourable</b> | <b>-1.16</b>                          |
| PHE        | Destabilising        | Favourable        | -1.08                                 |
| GLN        | Destabilising        | Unfavourable      | -0.91                                 |
| LYS        | Destabilising        | Unfavourable      | -1.64                                 |
| TYR        | Destabilising        | Favourable        | -1.76                                 |
| ASN        | Destabilising        | Unfavourable      | -1.79                                 |
| CYS        | Destabilising        | Favourable        | -2.35                                 |
| GLU        | Destabilising        | Unfavourable      | -1.79                                 |
| ASP        | Destabilising        | Unfavourable      | -1.88                                 |
| ARG        | Destabilising        | Unfavourable      | -1.41                                 |
| HIS        | Destabilising        | Unfavourable      | -0.96                                 |

**C****Comprehensive Prediction Results**

| Mutation Site |      | Structural Features    |                            |
|---------------|------|------------------------|----------------------------|
| Protein:      | 3J9V | SS element:            | Other (turns, coils, etc.) |
| Chain:        | O    | Solvent accessibility: | 12.97%                     |
| Wild type AA: | ILE  | Torsion angles:        | -112.6°, 132.6°            |
| Residue ID:   | 178  |                        |                            |

**Amino Acid Mutations**

| Amino acid | Overall Stability    | Torsion*          | Predicted $\Delta\Delta G$ (kcal/mol) |
|------------|----------------------|-------------------|---------------------------------------|
| GLY        | Destabilising        | Unfavourable      | -3.25                                 |
| ALA        | Destabilising        | Unfavourable      | -2.23                                 |
| VAL        | Destabilising        | Favourable        | -3.57                                 |
| LEU        | Destabilising        | Favourable        | -3.38                                 |
| MET        | Destabilising        | Unfavourable      | -5.92                                 |
| PRO        | Destabilising        | Unfavourable      | -4.62                                 |
| TRP        | Destabilising        | Favourable        | -4.68                                 |
| SER        | Destabilising        | Unfavourable      | -3.52                                 |
| <b>THR</b> | <b>Destabilising</b> | <b>Favourable</b> | <b>-3.72</b>                          |
| PHE        | Destabilising        | Favourable        | -2.45                                 |
| GLN        | Destabilising        | Unfavourable      | -7.92                                 |
| LYS        | Stabilising          | Unfavourable      | 0.49                                  |
| TYR        | Destabilising        | Favourable        | -3.97                                 |
| ASN        | Destabilising        | Unfavourable      | -2.22                                 |
| CYS        | Destabilising        | Favourable        | -9.78                                 |
| GLU        | Destabilising        | Unfavourable      | -2.82                                 |
| ASP        | Destabilising        | Unfavourable      | -3.61                                 |
| ARG        | Destabilising        | Unfavourable      | -3.7                                  |
| HIS        | Destabilising        | Unfavourable      | -3.52                                 |

**Supplementary Figure S3. Protein stability prediction (CUPSAT) implicates a destabilizing effect of the mutation in yeast VMA5.**

Thermal protein stability was predicted (<http://cupsat.tu-bs.de/index.jsp>) for the three states of VMA5 reported by Zhao et al. (*Nature* 521:241-245, 2015).<sup>15</sup> CUPSAT predicts stabilization of state 1 (**A**) and destabilization of state 2 (**B**) and state 3 (**C**). These results suggest a fixation of the protein in state 1 preventing the dynamic movement that is most likely necessary for the stability of the active ATPase (Zhao et al. *Nature* 521:241-245, 2015).<sup>15</sup>
