# Supplementary material
Source: PubMed Central journal article supplement (PMC7039771)
Supplement: NIHMS1542093-supplement-4.pdf [file NIHMS1542093-supplement-4.pdf]

**A**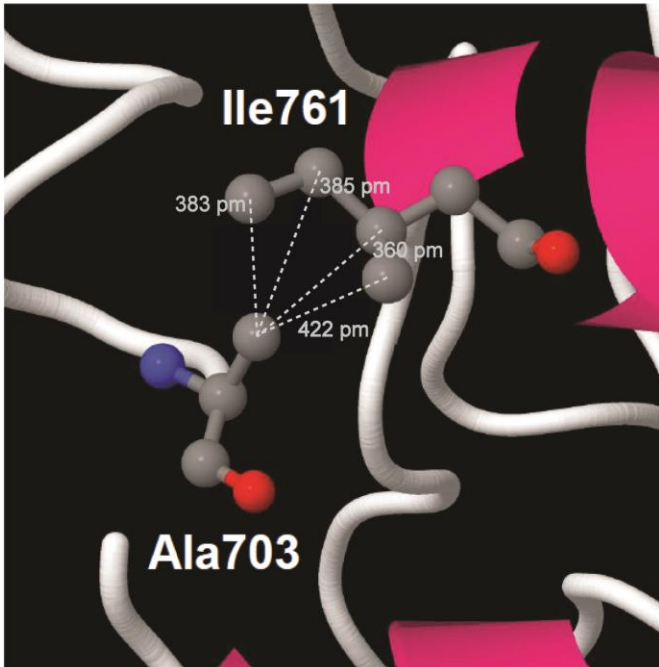

wildtype

**B**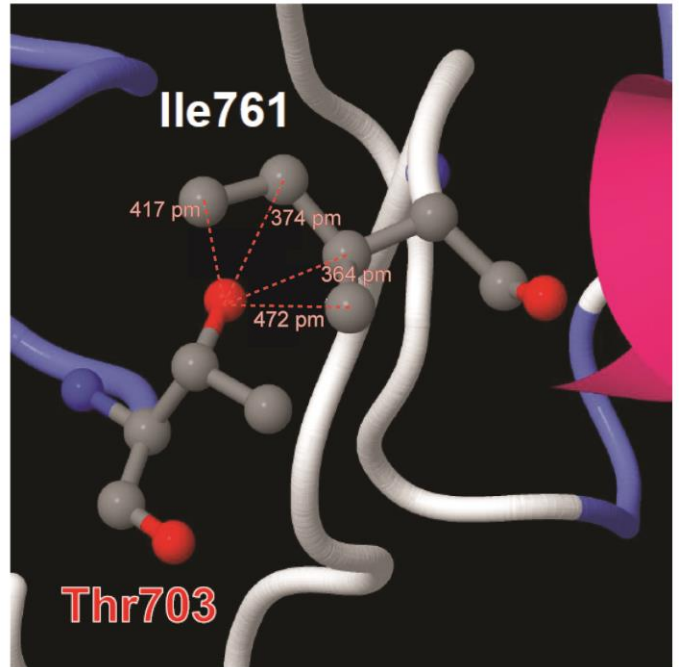

mutation

**Supplementary Figure S4. The hs. *SLC4A2* mutation c.503T>C, p.Ile168Thr may affect a hydrophobic interaction in *SLC4A2*.**

The hs. *SLC4A2* mutation was modeled on the crystal structure of its human *SLC4A1* paralog (Arakawa T Science 350:680-4, 2015).<sup>22</sup> Ala400 in *SLC4A1* corresponds to Ala703 in *SLC4A2*, and faces the hydrophobic amino acid Ile761. The mutation p.Ala703Thr introduces a polar, hydrophilic amino acid with a longer side chain and may interfere with the hydrophobic interaction.
