# Supplementary material
Source: PubMed Central journal article supplement (PMC7039771)
Supplement: NIHMS1542093-supplement-5.pdf [file NIHMS1542093-supplement-5.pdf]

## Comprehensive Prediction Results

| Mutation Site |      | Structural Features    |                            |
|---------------|------|------------------------|----------------------------|
| Protein:      | 4YZF | SS element:            | Other (turns, coils, etc.) |
| Chain:        | A    | Solvent accessibility: | 8.17%                      |
| Wild type AA: | ALA  | Torsion angles:        | -105.6°, 2.2°              |
| Residue ID:   | 400  |                        |                            |

### Amino Acid Mutations

| Amino acid | Overall Stability | Torsion*     | Predicted $\Delta\Delta G$ (kcal/mol) |
|------------|-------------------|--------------|---------------------------------------|
| GLY        | Destabilising     | Unfavourable | -1.22                                 |
| VAL        | Destabilising     | Unfavourable | -5.56                                 |
| LEU        | Destabilising     | Unfavourable | -3.26                                 |
| ILE        | Destabilising     | Unfavourable | -3.55                                 |
| MET        | Destabilising     | Unfavourable | -1.27                                 |
| PRO        | Destabilising     | Unfavourable | -1.82                                 |
| TRP        | Destabilising     | Unfavourable | -5.84                                 |
| SER        | Destabilising     | Favourable   | -1.93                                 |
| THR        | Destabilising     | Favourable   | -1.0                                  |
| PHE        | Destabilising     | Favourable   | -3.23                                 |
| GLN        | Destabilising     | Favourable   | -1.56                                 |
| LYS        | Stabilising       | Unfavourable | 2.42                                  |
| TYR        | Destabilising     | Favourable   | -3.36                                 |
| ASN        | Destabilising     | Favourable   | -2.44                                 |
| CYS        | Destabilising     | Unfavourable | -6.37                                 |
| GLU        | Stabilising       | Unfavourable | 0.45                                  |
| ASP        | Destabilising     | Favourable   | -1.15                                 |
| ARG        | Destabilising     | Favourable   | -0.73                                 |
| HIS        | Stabilising       | Favourable   | 0.94                                  |

### Supplementary Figure S5. Protein stability prediction (CUPSAT) suggests a destabilizing effect of the p.Ala703Thr mutation in SLC4A2.

The patient mutation in SLC4A2, c.503T>C, p.Ala703, was modeled on the crystal structure of the human SLC4A1 paralogue (Arakawa T Science 350:680-4, 2015).<sup>22</sup> Ala400 in SLC4A1 corresponds to Ala703 in SLC4A2. Thermal protein stability was predicted (<http://cupsat.tu-bs.de/index.jsp>) for the paralog SLC4A1. CUPSAT predicts destabilization of SLC4A2 for p.Ala703Thr.
