# Supplementary material
Source: PubMed Central journal article supplement (PMC7039771)
Supplement: NIHMS1542093-supplement-6.pdf [file NIHMS1542093-supplement-6.pdf]

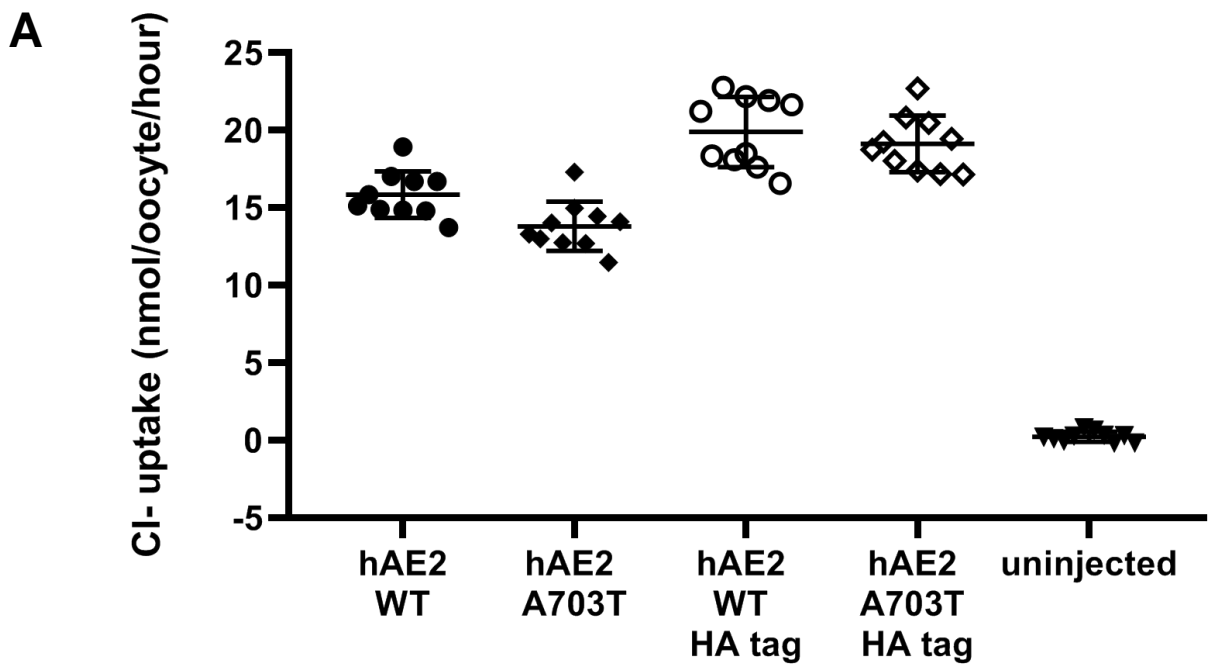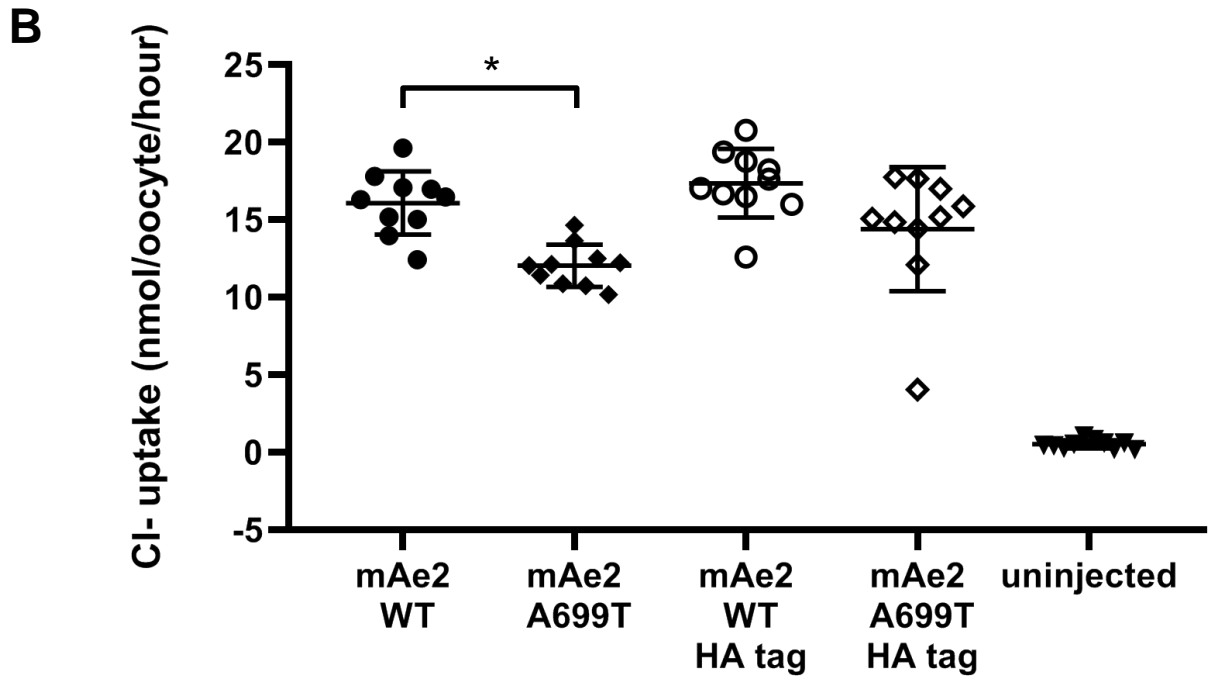

**Supplementary Figure S6. Similar levels of Cl<sup>-</sup> uptake by oocytes expressing hAE2 and its variant A703T.**

(A) *Xenopus laevis* oocytes were injected with 2 ng cRNA encoding human wild-type (WT) *SLC4A2* (hAE2) or missense variant A703T, or with cRNA encoding the same polypeptides with C-terminal HA-tags. 3 days post-cRNA injection, oocytes were subjected to a 30 min <sup>36</sup>Cl<sup>-</sup> uptake assay. Uninjected oocytes served as control. Mutant and WT uptake was indistinguishable. (B) Parallel experiment demonstrating that Cl<sup>-</sup> uptake by mouse *SLC4A2* (AE2) variant A699T or its HA-tagged form was similar to that of wild type mouse AE2 or its HA-tagged form. \*, p < 0.0001 vs. mAe2 WT (t-test). Means ± S.E.M. for 10 oocytes in each group.
