# Supplementary material
Source: PubMed Central journal article supplement (PMC7039771)
Supplement: NIHMS1542093-supplement-8.pdf [file NIHMS1542093-supplement-8.pdf]

**A**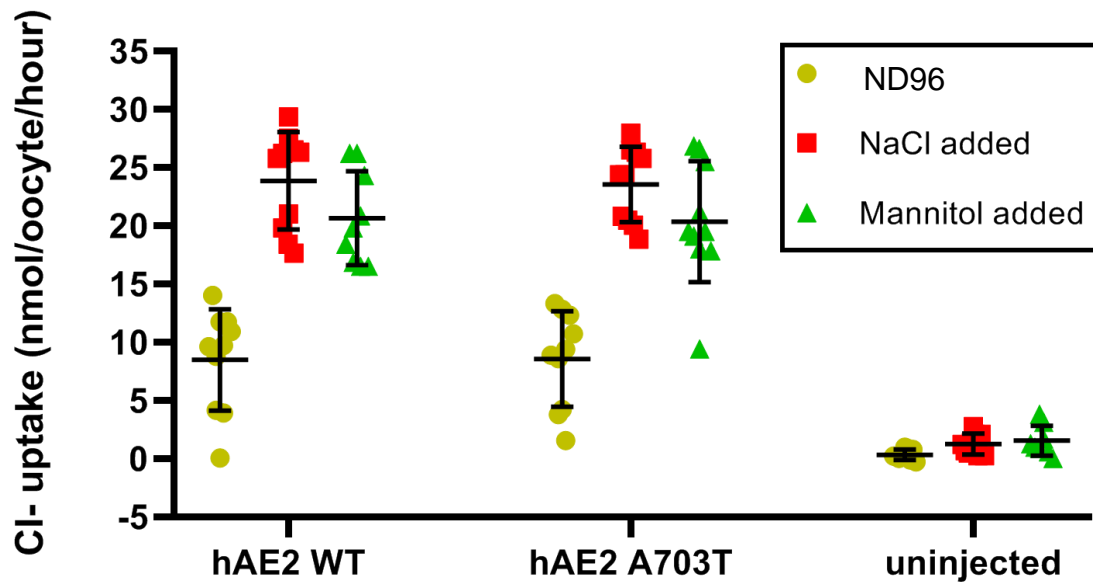**B**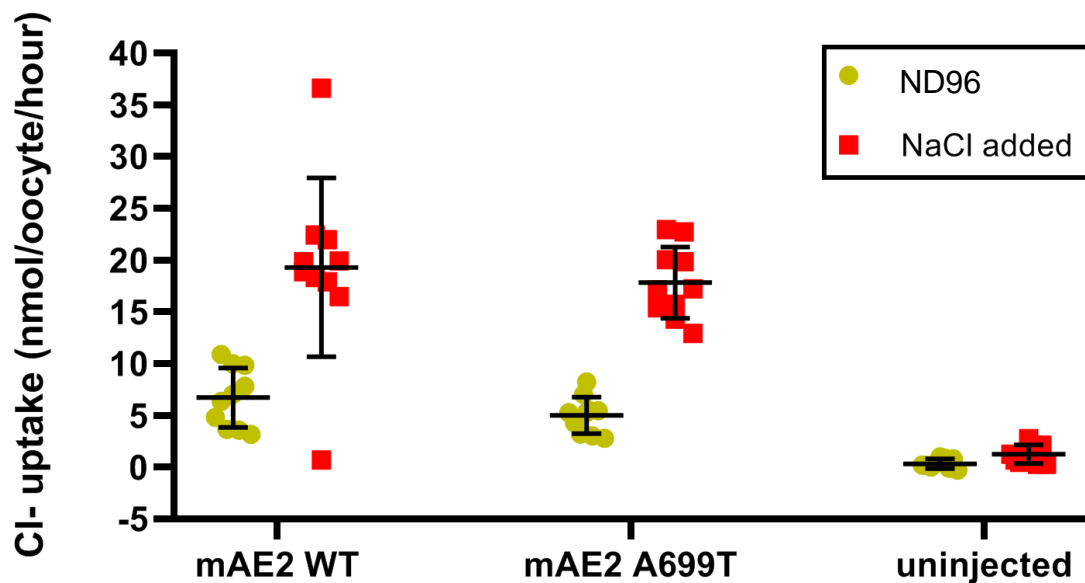

**Supplementary Figure S8. Indistinguishable activation by hyperosmolarity of Cl<sup>-</sup> uptake mediated by hAE2 WT and by variant A703T.** (A) <sup>36</sup>Cl<sup>-</sup> uptake by oocytes previously injected with the indicated cRNAs were preincubated 20 min in ND96 or in ND96 with osmolality adjusted to 400 mOsm by addition of either supplemental NaCl or supplemental mannitol. hAE2 and A703T values did not differ in either hypertonic bath. (B) In a parallel experiment, <sup>36</sup>Cl<sup>-</sup> uptake by oocytes expressing mouse mAe2 or mAE2 variant A699T was tested for response to hyperosmotic ND96 containing excess NaCl. mAE2 and A699T values did not differ. Means ± S.E.M. for 9-10 oocytes.
