# Supplementary material
Source: PubMed Central journal article supplement (PMC7039771)
Supplement: NIHMS1542093-supplement-9.pdf [file NIHMS1542093-supplement-9.pdf]

**A**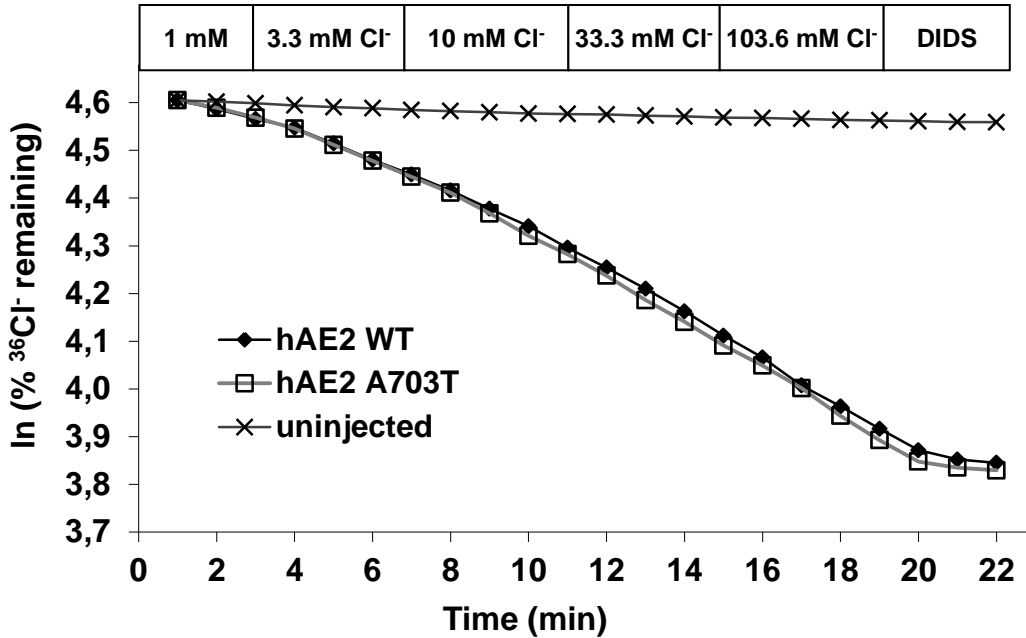**B**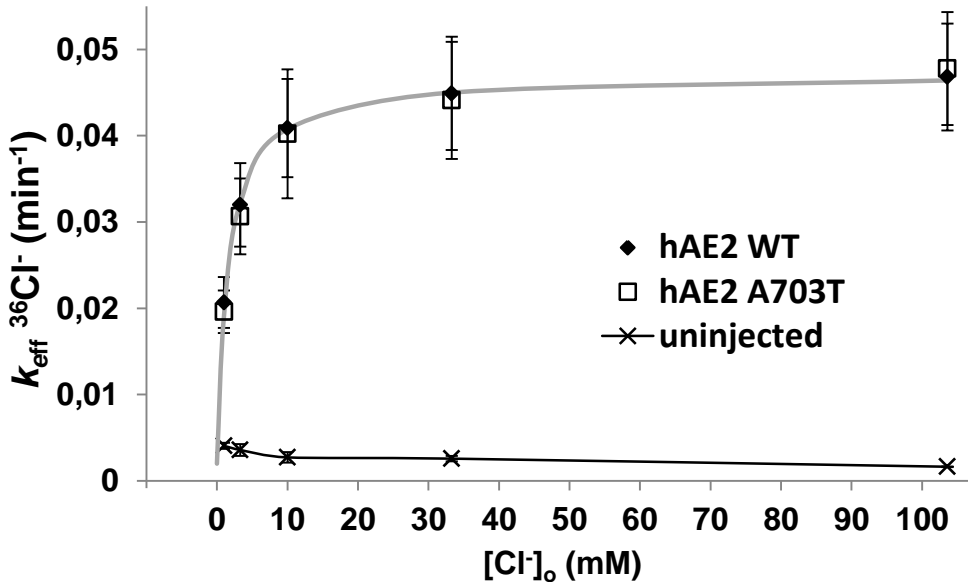

**Supplementary Figure S9. Indistinguishable  $[\text{Cl}^-]_o$  dependence of  $^{36}\text{Cl}^-/\text{Cl}^-_o$  exchange mediated by hAE2 and variant A703T. (A) Representative  $^{36}\text{Cl}^-$  efflux traces from individual oocytes expressing 2 ng hAE2 or hAE2 A703T cRNA or from an uninjected oocyte during sequential exposures to baths containing the indicated increasing  $[\text{Cl}^-]$ . (B)  $\text{Cl}^-/\text{Cl}^-_o$  efflux rate constants at each tested  $[\text{Cl}^-]_o$  for oocytes expressing hAE2 (n=5), hAE2 A703T (n=6), and uninjected oocytes (n=3). As data from oocytes expressing hAE2 and hAE2 A703T did not differ statistically, they were fit to a single Michaelis-Menten curve, with  $K_{1/2}(\text{Cl}^-_o)$  of 2.4 mM. Values are means  $\pm$  S.E.M.**
