# Supplementary material
Source: PubMed Central journal article supplement (PMC7039771)
Supplement: NIHMS1542093-supplement-10.pdf [file NIHMS1542093-supplement-10.pdf]

**A**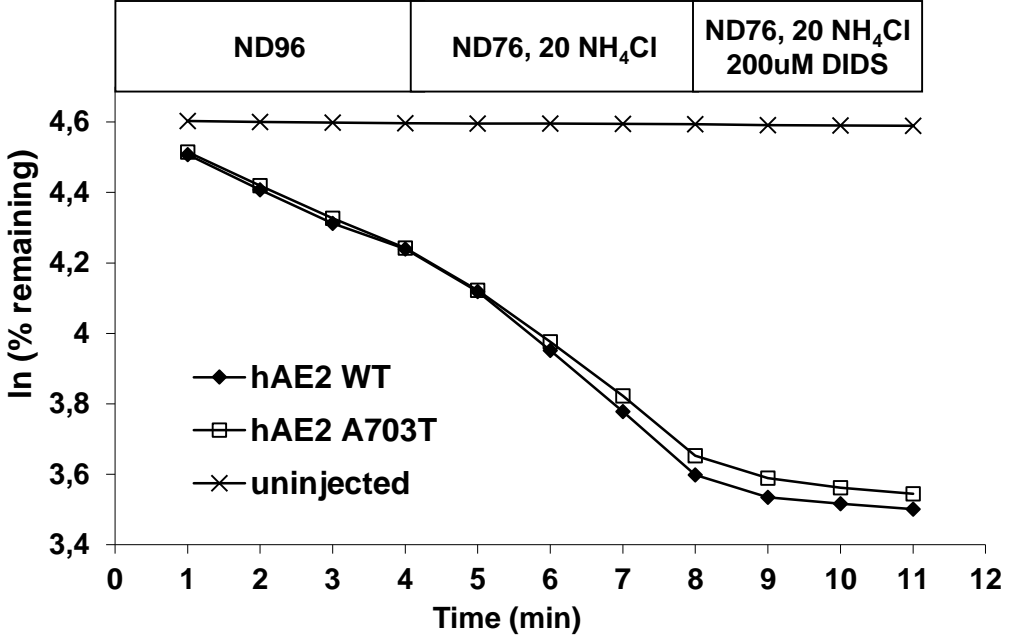**B**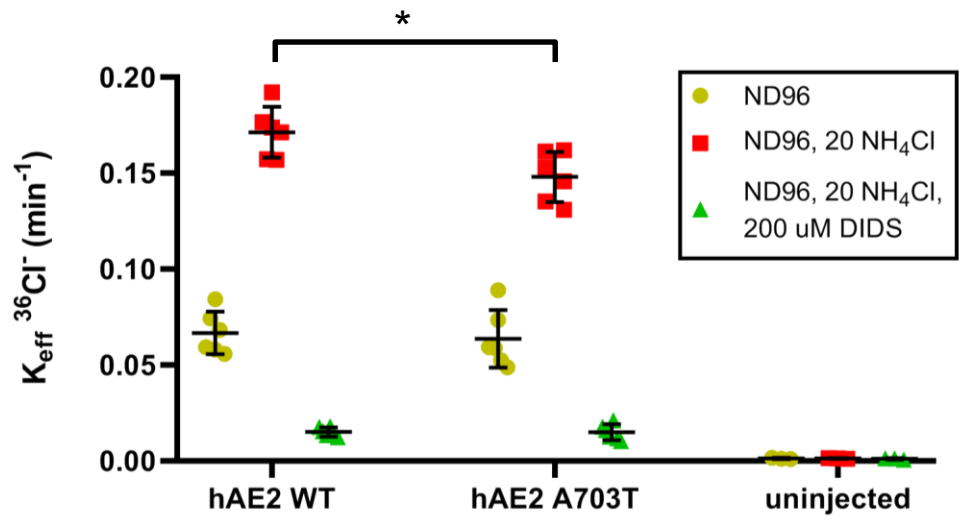

**Supplementary Figure S10. Slightly reduced activation by NH<sub>4</sub><sup>+</sup> of <sup>36</sup>Cl<sub>i</sub>/Cl<sub>o</sub> exchange mediated by hAE2 and variant A703T compared to hAE2 WT. (A) <sup>36</sup>Cl<sup>-</sup> efflux traces from representative individual oocytes expressing 2 ng hAE2 or hAE2 A703T cRNA, or from an uninjected oocyte, during sequential exposure to baths containing first ND96, then ND76 plus 20 mM NH<sub>4</sub>Cl, followed by addition of DIDS. (B) <sup>36</sup>Cl<sup>-</sup> efflux rate constants of oocytes expressing hAE2 and hAE2 A703T in the conditions shown in panel A. \*, p<0.05 vs. hAE2 WT NH<sub>4</sub><sup>+</sup>-stimulated value. Means ± S.E.M. for (6) oocytes.**
