# Supplementary material
Source: PubMed Central journal article supplement (PMC7039771)
Supplement: NIHMS1542093-supplement-11.pdf [file NIHMS1542093-supplement-11.pdf]

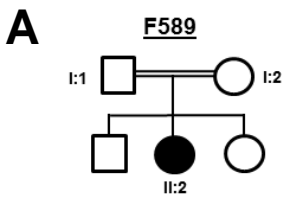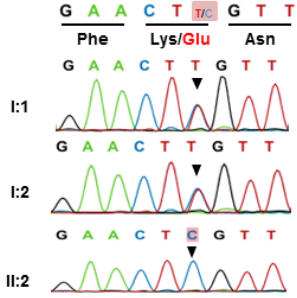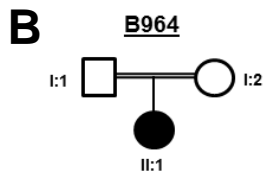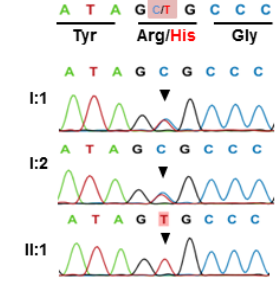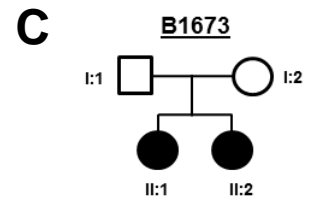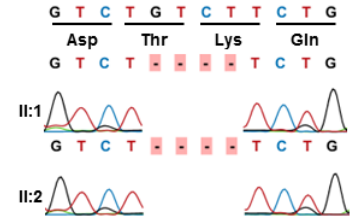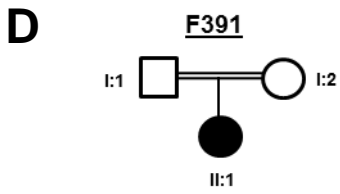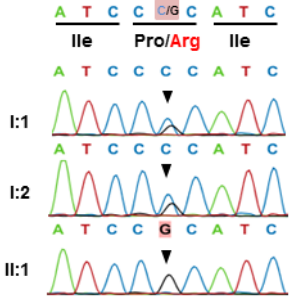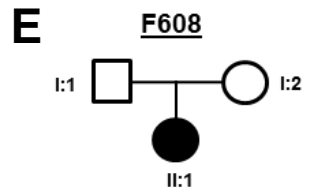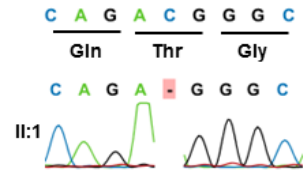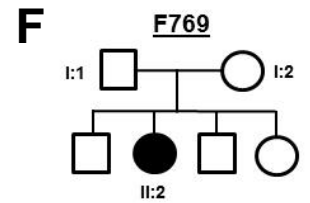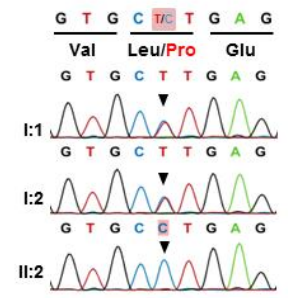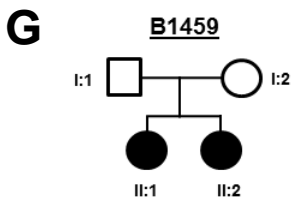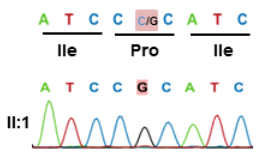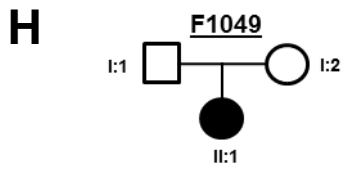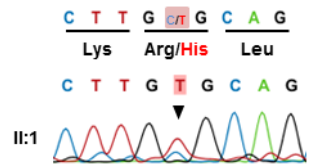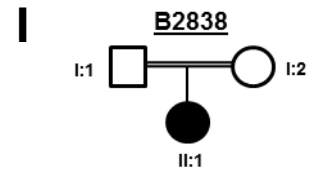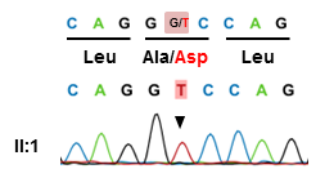

**J****B3155**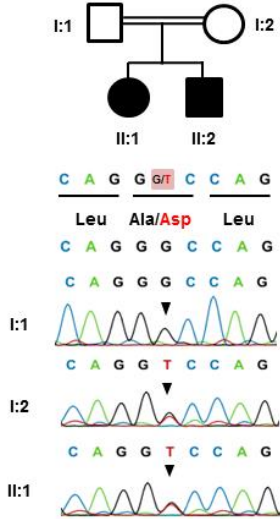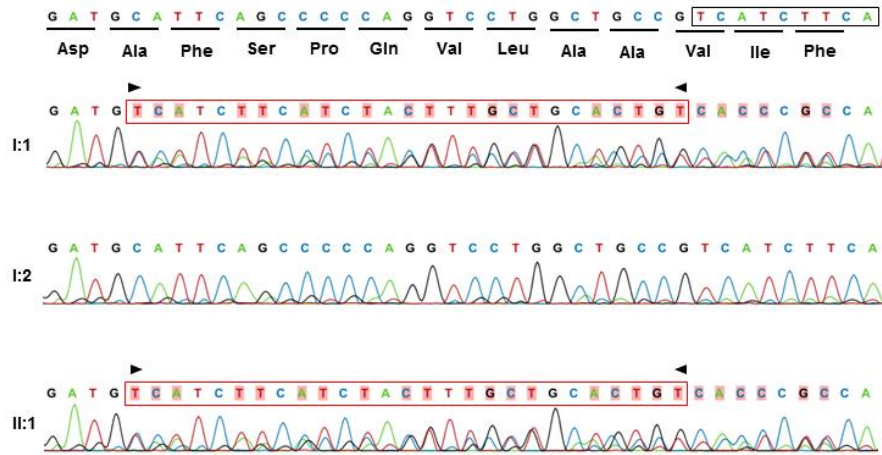

**Supplementary Fig S11. Sequencing traces and family pedigrees of individuals with dRTA.** Vertical downward arrowheads denote altered nucleotides.
