# Supplementary material
Source: PubMed Central journal article supplement (PMC7039771)
Supplement: NIHMS1542093-supplement-12.pdf [file NIHMS1542093-supplement-12.pdf]

**Supplementary Table 1. Information on mean coverage of known and candidate dRTA genes per family.** Genes that were solved for a known gene were marked in blue, candidate gene in the families were marked in red. All genes had a mean coverage above 20X.

| Family Nr. | Gene            | Mean X coverage of known and candidate gene | Mean X coverage of all 7 known and candidate genes/family |
|------------|-----------------|---------------------------------------------|-----------------------------------------------------------|
| B964-21    | <i>SLC4A1</i>   | 51.4                                        | 47.5                                                      |
|            | <i>ATP6V1B1</i> | 103.8                                       |                                                           |
|            | <i>ATP6V0A4</i> | 33.2                                        |                                                           |
|            | <i>SLC4A2</i>   | 47.4                                        |                                                           |
|            | <i>FOXI1</i>    | 27.33                                       |                                                           |
|            | <i>WDR72</i>    | 35.5                                        |                                                           |
|            | <i>ATP6V1C2</i> | 28.6                                        |                                                           |
| B3155-21   | <i>SLC4A1</i>   | 57.98                                       | 63.4                                                      |
|            | <i>ATP6V1B1</i> | 72.9                                        |                                                           |
|            | <i>ATP6V0A4</i> | 78.2                                        |                                                           |
|            | <i>SLC4A2</i>   | 63.089                                      |                                                           |
|            | <i>FOXI1</i>    | 49.3                                        |                                                           |
|            | <i>WDR72</i>    | 60.1                                        |                                                           |
|            | <i>ATP6V1C2</i> | 45.3                                        |                                                           |
| B2838-21   | <i>SLC4A1</i>   | 128.5                                       | 106.2                                                     |
|            | <i>ATP6V1B1</i> | 153.1                                       |                                                           |
|            | <i>ATP6V0A4</i> | 78.1                                        |                                                           |
|            | <i>SLC4A2</i>   | 134.9                                       |                                                           |
|            | <i>FOXI1</i>    | 108.2                                       |                                                           |
|            | <i>WDR72</i>    | 61.7                                        |                                                           |
|            | <i>ATP6V1C2</i> | 87.5                                        |                                                           |
| B1022-21   | <i>SLC4A1</i>   | 51.3                                        | 42.5                                                      |
|            | <i>ATP6V1B1</i> | 100                                         |                                                           |
|            | <i>ATP6V0A4</i> | 27.5                                        |                                                           |
|            | <i>SLC4A2</i>   | 38.2                                        |                                                           |
|            | <i>FOXI1</i>    | 29.84                                       |                                                           |
|            | <i>WDR72</i>    | 29.7                                        |                                                           |
|            | <i>ATP6V1C2</i> | 23.5                                        |                                                           |
| F382-25    | <i>SLC4A1</i>   | 62                                          | 60                                                        |
|            | <i>ATP6V1B1</i> | 31.2                                        |                                                           |
|            | <i>ATP6V0A4</i> | 79                                          |                                                           |
|            | <i>SLC4A2</i>   | 64.7                                        |                                                           |
|            | <i>FOXI1</i>    | 57.3                                        |                                                           |
|            | <i>WDR72</i>    | 59.5                                        |                                                           |
|            | <i>ATP6V1C2</i> | 49.4                                        |                                                           |
| B2673-21   | <i>SLC4A1</i>   | 85.9                                        | 105.3                                                     |
|            | <i>ATP6V1B1</i> | 131.9                                       |                                                           |
|            | <i>ATP6V0A4</i> | 154.4                                       |                                                           |
|            | <i>SLC4A2</i>   | 73.4                                        |                                                           |
|            | <i>FOXI1</i>    | 141.2                                       |                                                           |
|            | <i>WDR72</i>    | 97.7                                        |                                                           |
|            | <i>ATP6V1C2</i> | 52.4                                        |                                                           |
| B2673-22   | <i>SLC4A1</i>   | 113.6                                       | 92.4                                                      |
|            | <i>ATP6V1B1</i> | 133.7                                       |                                                           |
|            | <i>ATP6V0A4</i> | 67.8                                        |                                                           |
|            | <i>SLC4A2</i>   | 114.9                                       |                                                           |
|            | <i>FOXI1</i>    | 88.6                                        |                                                           |

|                 |                 |       |        |
|-----------------|-----------------|-------|--------|
|                 | <b>WDR72</b>    | 54.7  |        |
|                 | <b>ATP6V1C2</b> | 76.7  |        |
| <b>F588-21</b>  | <b>SLC4A1</b>   | 57.8  | 59.2   |
|                 | <b>ATP6V1B1</b> | 32.0  |        |
|                 | <b>ATP6V0A4</b> | 75.7  |        |
|                 | <b>SLC4A2</b>   | 63.0  |        |
|                 | <b>FOXI1</b>    | 52.2  |        |
|                 | <b>WDR72</b>    | 64.3  |        |
|                 | <b>ATP6V1C2</b> | 50.1  |        |
| <b>B2840-21</b> | <b>SLC4A1</b>   | 140.6 | 117.3  |
|                 | <b>ATP6V1B1</b> | 168.6 |        |
|                 | <b>ATP6V0A4</b> | 91.9  |        |
|                 | <b>SLC4A2</b>   | 156.5 |        |
|                 | <b>FOXI1</b>    | 116.3 |        |
|                 | <b>WDR72</b>    | 70.1  |        |
|                 | <b>ATP6V1C2</b> | 91.4  |        |
| <b>B2842-21</b> | <b>SLC4A1</b>   | 149.5 | 129.16 |
|                 | <b>ATP6V1B1</b> | 188   |        |
|                 | <b>ATP6V0A4</b> | 95.6  |        |
|                 | <b>SLC4A2</b>   | 161.5 |        |
|                 | <b>FOXI1</b>    | 115   |        |
|                 | <b>WDR72</b>    | 84.7  |        |
|                 | <b>ATP6V1C2</b> | 106.5 |        |
| <b>F604-21</b>  | <b>SLC4A1</b>   | 52.5  | 55.9   |
|                 | <b>ATP6V1B1</b> | 30.5  |        |
|                 | <b>ATP6V0A4</b> | 70.4  |        |
|                 | <b>SLC4A2</b>   | 60.1  |        |
|                 | <b>FOXI1</b>    | 46.6  |        |
|                 | <b>WDR72</b>    | 63.2  |        |
|                 | <b>ATP6V1C2</b> | 74.8  |        |
